# Supplementary material for: 29Si Solid-State NMR Analysis of Opal-AG, Opal-AN and Opal-CT: Single Pulse Spectroscopy and Spin-Lattice T1 Relaxometry
Source: MDPI journal article supplement (doi:10.3390/min12030323), 2022-03-04
Supplement: s1 [file s1]

---

# **$^{29}\text{Si}$ Solid-State NMR Analysis of Opal-AG, Opal-AN and Opal-CT: Single Pulse Spectroscopy and Spin-Lattice $T_1$ Relaxometry**

Neville J. Curtis, Jason R. Gascooke, Martin R. Johnston\* and Allan Pring

## Electronic Supplementary Information

**Table S1: Laser Ablation/Ion Coupled Plasma Elemental Analyses (ppm by weight)**

|         |        | <sup>27</sup> Al | <sup>69</sup> Ga |                  | <sup>31</sup> P  |                  | <sup>23</sup> Na | <sup>39</sup> K  | <sup>85</sup> Rb | <sup>133</sup> Cs | <sup>24</sup> Mg | <sup>43</sup> Ca | <sup>88</sup> Sr  | <sup>137</sup> Ba |
|---------|--------|------------------|------------------|------------------|------------------|------------------|------------------|------------------|------------------|-------------------|------------------|------------------|-------------------|-------------------|
| Opal-AG | G1401  | 6.58E+03         | 2.62E+00         |                  | 3.12E+00         |                  | 9.42E+02         | 1.08E+03         | 1.23E+01         | 2.38E+00          | 3.23E+02         | 2.42E+03         | 7.92E+01          | 1.55E+02          |
|         | G9811  | 5.99E+03         | 2.61E+00         |                  | 3.54E+00         |                  | 9.75E+02         | 1.25E+03         | 1.08E+01         | 2.94E+00          | 1.63E+02         | 2.08E+03         | 9.08E+01          | 1.54E+02          |
|         | T2233  | 6.11E+03         | 2.73E+00         |                  | 3.91E+01         |                  | 8.05E+02         | 2.07E+03         | 1.09E+01         | 1.83E+00          | 1.88E+02         | 1.45E+03         | 4.68E+01          | 1.44E+02          |
|         | G8608  | 4.56E+03         | 1.36E+00         |                  | 3.53E+00         |                  | 1.01E+03         | 8.11E+02         | 1.31E+01         | 2.82E+00          | 1.37E+02         | 9.27E+02         | 3.36E+01          | 8.38E+01          |
|         |        |                  |                  |                  |                  |                  |                  |                  |                  |                   |                  |                  |                   |                   |
| Opal-AN | E1937  | 5.19E+00         | 3.02E-02         |                  | 3.29E+00         |                  | 5.55E+00         | 2.10E+00         | 1.22E-02         | 0.00E+00          | 2.28E+01         | 3.62E+01         | 1.96E-01          | 1.22E-01          |
|         | MS-4   | 6.42E+00         | 2.59E-02         |                  | 3.55E+00         |                  | 6.12E+00         | 1.39E+01         | 5.99E-02         | 5.88E-04          | 7.09E+01         | 8.25E+01         | 3.60E-01          | 2.27E-04          |
|         | G32740 | 8.10E+00         | 2.06E-02         |                  | 8.43E+00         |                  | 7.78E+00         | 1.08E+01         | 1.57E-01         | 1.85E-03          | 1.01E+01         | 1.30E+02         | 1.82E-01          | 1.81E-01          |
|         | M8736  | 3.57E+00         | 1.01E-02         |                  | 3.33E+00         |                  | 8.09E+00         | 3.32E+00         | 1.16E-02         | 0.00E+00          | 2.74E+01         | 3.52E+01         | 1.38E-01          | 4.38E-03          |
|         | OOC10  | 4.58E-01         | 8.92E-03         |                  | 3.30E+00         |                  | 6.17E+00         | 8.83E+00         | 4.09E-02         | 8.69E-03          | 5.57E+01         | 6.29E+01         | 4.55E-01          | 1.39E-01          |
|         | T18511 | 8.93E-01         | 1.79E-02         |                  | 3.34E+00         |                  | 5.30E+00         | 6.92E+00         | 5.31E-02         | 5.75E-03          | 5.18E+00         | 3.26E+01         | 1.36E-01          | 1.27E-02          |
|         | T18117 | 1.60E+01         | 1.38E-01         |                  | 5.11E+00         |                  | 4.76E+02         | 6.04E+01         | 2.81E-01         | 9.78E-02          | 9.08E+02         | 1.46E+03         | 1.52E+01          | 9.85E-01          |
|         | G7107  | 2.26E+01         | 1.08E-01         |                  | 4.78E+00         |                  | 5.10E+00         | 1.17E+01         | 7.04E-02         | 4.09E-04          | 3.42E+01         | 9.71E+01         | 4.56E-01          | 2.57E-02          |
|         | G8877  | 2.73E-01         | 6.69E-03         |                  | 3.35E+00         |                  | 3.62E+00         | 1.03E+01         | 6.03E-02         | 3.33E-03          | 6.68E+01         | 8.81E+01         | 5.02E-01          | 2.51E-02          |
|         | G13764 | 3.13E+00         | 6.16E-02         |                  | 3.16E+00         |                  | 1.91E+00         | 1.07E+01         | 6.99E-02         | 0.00E+00          | 7.26E+00         | 2.56E+01         | 9.16E-02          | 2.44E-03          |
|         |        |                  |                  |                  |                  |                  |                  |                  |                  |                   |                  |                  |                   |                   |
| Opal-CT | G9942  | 2.98E+01         | 1.63E-01         |                  | 3.93E+00         |                  | 4.58E+01         | 6.28E+00         | 6.39E-02         | 2.13E-02          | 5.53E+01         | 4.79E+01         | 3.80E-01          | 6.00E-02          |
|         | ETH S2 | 6.76E+03         | 1.25E+00         |                  | 2.86E+00         |                  | 2.98E+02         | 9.66E+02         | 1.46E+01         | 1.38E+00          | 1.28E+02         | 4.00E+03         | 3.51E+01          | 2.56E+01          |
|         | GNEW03 | 3.64E+03         | 1.45E+00         |                  | 4.30E+00         |                  | 9.47E+02         | 2.25E+02         | 3.82E-01         | 3.95E-02          | 1.16E+03         | 5.23E+02         | 7.93E+00          | 1.96E+00          |
|         | OOC3   | 4.32E+03         | 2.49E+00         |                  | 1.66E+01         |                  | 1.62E+02         | 2.55E+03         | 1.06E+01         | 2.00E-01          | 6.51E+02         | 1.60E+03         | 1.83E+01          | 6.04E+00          |
|         | T22842 | 3.71E-01         | 2.24E-02         |                  | 5.84E+00         |                  | 4.29E+01         | 1.54E+01         | 9.34E-03         | 2.53E-04          | 2.94E+01         | 1.23E+02         | 6.52E-01          | 9.96E-01          |
|         |        |                  |                  |                  |                  |                  |                  |                  |                  |                   |                  |                  |                   |                   |
|         |        | <sup>49</sup> Ti | <sup>51</sup> V  | <sup>55</sup> Mn | <sup>57</sup> Fe | <sup>59</sup> Co | <sup>60</sup> Ni | <sup>65</sup> Cu | <sup>66</sup> Zn |                   | <sup>89</sup> Y  | <sup>90</sup> Zr | <sup>139</sup> La | <sup>178</sup> Hf |
| Opal-AG | G1401  | 6.83E+00         | 7.01E-02         | 9.17E+00         | 4.85E+02         | 1.09E-02         | 6.94E-02         | 2.88E-02         | 2.12E-01         |                   | 7.07E-01         | 6.66E+01         | 6.20E-01          | 2.24E+00          |
|         | G9811  | 5.30E+00         | 8.96E-02         | 5.50E+00         | 3.93E+02         | 1.39E-02         | 5.66E-02         | 2.67E-02         | 6.63E-02         |                   | 2.32E-01         | 9.07E+01         | 2.39E-01          | 2.60E+00          |
|         | T2233  | 7.22E+02         | 4.76E+00         | 1.85E+01         | 1.04E+03         | 5.00E+01         | 1.73E+01         | 1.59E+02         | 1.53E+01         |                   | 1.00E+01         | 1.90E+02         | 1.37E+01          | 4.79E+00          |
|         | G8608  | 8.36E+00         | 8.95E-02         | 5.30E+00         | 2.71E+02         | 5.53E-02         | 1.00E-01         | 1.46E-01         | 4.47E-01         |                   | 3.73E-01         | 8.03E+01         | 3.68E-01          | 2.41E+00          |

## Opal-AN

|        |          |          |          |          |          |          |          |          |          |          |          |          |
|--------|----------|----------|----------|----------|----------|----------|----------|----------|----------|----------|----------|----------|
| E1937  | 1.28E-01 | 3.47E-01 | 2.61E-02 | 2.20E-01 | 3.61E-03 | 2.36E-02 | 9.03E-03 | 5.52E-02 | 6.03E-03 | 5.81E-02 | 1.59E-04 | 1.83E-04 |
| MS-4   | 2.07E-02 | 4.95E-01 | 3.22E-02 | 0.00E+00 | 0.00E+00 | 3.55E-03 | 0.00E+00 | 3.06E-01 | 7.96E-03 | 2.28E-02 | 1.12E-04 | 3.90E-04 |
| G32740 | 6.33E-01 | 4.58E-01 | 1.22E-01 | 6.30E+00 | 2.74E-02 | 1.59E-01 | 5.47E-01 | 5.31E-01 | 4.69E-03 | 6.28E-02 | 4.53E-03 | 4.05E-03 |
| M8736  | 9.34E-03 | 4.34E-01 | 2.40E-02 | 0.00E+00 | 0.00E+00 | 1.92E-02 | 7.57E-03 | 7.72E-02 | 4.41E-04 | 1.75E-03 | 1.04E-04 | 1.47E-04 |
| OOC10  | 6.02E-03 | 2.33E-01 | 2.47E-02 | 0.00E+00 | 8.83E-04 | 2.17E-02 | 2.24E-02 | 3.61E-01 | 7.10E-03 | 1.28E-03 | 1.68E-04 | 0.00E+00 |
| T18511 | 1.09E-02 | 4.17E-02 | 2.72E-02 | 0.00E+00 | 0.00E+00 | 3.43E-03 | 2.43E-03 | 5.68E-02 | 1.49E-02 | 2.05E-03 | 6.70E-04 | 4.52E-04 |
| T18117 | 2.14E-01 | 1.50E-02 | 7.14E+00 | 4.11E+00 | 2.60E-02 | 7.05E-02 | 2.49E+00 | 9.91E-01 | 3.02E+01 | 1.18E-02 | 4.49E-01 | 1.10E-03 |
| G7107  | 3.52E-01 | 5.78E-01 | 5.26E-02 | 2.31E+00 | 7.50E-04 | 2.21E-02 | 3.76E-02 | 1.14E-01 | 5.20E-03 | 2.11E-02 | 5.73E-03 | 1.32E-03 |
| G8877  | 6.54E-02 | 7.75E-01 | 2.59E-02 | 0.00E+00 | 1.77E-03 | 1.86E-02 | 2.77E-02 | 3.97E-01 | 2.26E-03 | 4.70E-04 | 3.04E-04 | 6.96E-05 |
| G13764 | 4.03E-02 | 4.66E-02 | 3.28E-02 | 0.00E+00 | 0.00E+00 | 2.00E-02 | 2.81E-02 | 7.83E-02 | 2.75E-03 | 6.13E-04 | 3.18E-04 | 1.25E-04 |

## Opal-CT

|        |          |          |          |          |          |          |          |          |          |          |          |          |
|--------|----------|----------|----------|----------|----------|----------|----------|----------|----------|----------|----------|----------|
| G9942  | 2.70E+00 | 3.48E-01 | 2.67E-01 | 5.43E+01 | 2.38E-02 | 9.51E-02 | 1.24E-01 | 1.77E-01 | 6.33E-03 | 4.09E-02 | 1.14E-03 | 4.34E-04 |
| ETH S2 | 4.68E+01 | 5.36E-04 | 1.71E+01 | 7.24E+02 | 1.84E-02 | 2.26E-02 | 2.08E-02 | 1.55E+00 | 5.26E+00 | 3.78E+01 | 2.49E+00 | 1.25E+00 |
| GNEW03 | 3.30E-01 | 8.04E-01 | 2.43E+00 | 1.75E+04 | 1.14E+00 | 9.62E+00 | 8.85E+00 | 2.28E+01 | 1.62E-01 | 1.34E+01 | 1.02E-02 | 2.47E-02 |
| OOC3   | 7.43E+02 | 5.74E+01 | 1.51E+00 | 1.10E+03 | 6.49E-01 | 7.23E+00 | 8.28E+00 | 4.84E+00 | 5.38E-01 | 2.11E+01 | 1.84E+00 | 6.17E-01 |
| T22842 | 8.29E-02 | 2.24E-01 | 1.37E-01 | 2.01E+02 | 4.22E-03 | 7.48E-02 | 3.06E+00 | 1.20E+00 | 1.95E-02 | 3.24E-02 | 5.74E-03 | 1.61E-04 |

|         |        | <sup>140</sup> Ce | <sup>141</sup> Pr | <sup>146</sup> Nd | <sup>147</sup> Sm | <sup>151</sup> Eu | <sup>153</sup> Eu | <sup>157</sup> Gd | <sup>159</sup> Tb | <sup>163</sup> Dy | <sup>165</sup> Ho | <sup>166</sup> Er | <sup>169</sup> Tm | <sup>172</sup> Yb | <sup>175</sup> Lu |
|---------|--------|-------------------|-------------------|-------------------|-------------------|-------------------|-------------------|-------------------|-------------------|-------------------|-------------------|-------------------|-------------------|-------------------|-------------------|
| Opal-AG |        |                   |                   |                   |                   |                   |                   |                   |                   |                   |                   |                   |                   |                   |                   |
|         | G1401  | 1.33E+00          | 1.44E-01          | 6.16E-01          | 1.22E-01          | 4.32E-02          | 4.49E-02          | 1.23E-01          | 1.64E-02          | 1.01E-01          | 2.08E-02          | 5.83E-02          | 8.19E-03          | 5.09E-02          | 7.39E-03          |
|         | G9811  | 4.64E-01          | 4.82E-02          | 2.01E-01          | 3.69E-02          | 1.18E-02          | 1.37E-02          | 3.76E-02          | 4.75E-03          | 3.05E-02          | 6.70E-03          | 1.82E-02          | 2.39E-03          | 1.44E-02          | 2.11E-03          |
|         | T2233  | 3.22E+01          | 3.48E+00          | 1.33E+01          | 2.67E+00          | 7.93E-01          | 7.93E-01          | 2.20E+00          | 3.24E-01          | 1.87E+00          | 3.69E-01          | 1.04E+00          | 1.49E-01          | 1.02E+00          | 1.49E-01          |
|         | G8608  | 9.49E-01          | 1.05E-01          | 4.42E-01          | 8.92E-02          | 2.85E-02          | 2.69E-02          | 7.97E-02          | 1.07E-02          | 6.43E-02          | 1.31E-02          | 3.59E-02          | 4.89E-03          | 3.31E-02          | 4.93E-03          |
| Opal-AN |        |                   |                   |                   |                   |                   |                   |                   |                   |                   |                   |                   |                   |                   |                   |
|         | E1937  | 3.37E-04          | 9.44E-05          | 3.77E-04          | 1.16E-04          | 4.71E-05          | 3.73E-04          | 5.35E-04          | 1.15E-04          | 7.61E-04          | 7.64E-05          | 4.44E-04          | 2.56E-04          | 1.60E-03          | 3.60E-04          |
|         | MS-4   | 2.40E-04          | 2.64E-04          | 2.07E-04          | 3.71E-04          | 7.89E-05          | 2.93E-04          | 1.64E-04          | 1.02E-04          | 7.68E-04          | 3.52E-04          | 7.26E-04          | 3.40E-04          | 4.83E-03          | 1.08E-03          |
|         | G32740 | 1.66E-02          | 2.02E-03          | 7.56E-03          | 2.25E-03          | 1.19E-03          | 1.06E-03          | 2.42E-03          | 3.77E-04          | 3.38E-03          | 1.01E-03          | 1.02E-03          | 9.79E-04          | 1.77E-03          | 9.11E-04          |
|         | M8736  | 6.07E-04          | 1.51E-04          | 1.34E-04          | 1.39E-04          | 3.07E-05          | 3.24E-04          | 3.17E-04          | 3.41E-04          | 3.35E-04          | 2.39E-04          | 4.56E-05          | 1.24E-04          | 3.67E-04          | 7.43E-05          |
|         | OOC10  | 4.03E-04          | 1.91E-04          | 1.97E-04          | 6.20E-04          | 8.84E-05          | 4.73E-05          | 8.50E-04          | 1.47E-04          | 4.41E-04          | 1.10E-04          | 4.13E-04          | 1.02E-04          | 3.24E-03          | 6.98E-04          |
|         | T18511 | 1.19E-03          | 3.34E-04          | 1.37E-03          | 9.83E-04          | 1.04E-04          | 1.11E-04          | 1.32E-03          | 3.03E-04          | 1.84E-03          | 4.97E-04          | 1.55E-03          | 3.42E-04          | 4.17E-03          | 8.55E-04          |
|         | T18117 | 8.43E-02          | 8.45E-02          | 3.82E-01          | 2.91E-01          | 6.63E-02          | 6.45E-02          | 1.01E+00          | 2.56E-01          | 2.03E+00          | 4.43E-01          | 1.44E+00          | 2.21E-01          | 1.38E+00          | 2.02E-01          |
|         | G7107  | 2.03E-02          | 2.07E-03          | 6.25E-03          | 2.02E-03          | 2.78E-04          | 8.81E-04          | 7.32E-04          | 2.93E-04          | 1.84E-03          | 3.26E-04          | 1.07E-03          | 9.93E-05          | 1.36E-03          | 9.59E-05          |
|         | G8877  | 9.79E-05          | 1.04E-04          | 1.48E-04          | 2.55E-04          | 9.60E-05          | 4.21E-05          | 5.27E-04          | 4.27E-05          | 3.25E-04          | 2.71E-04          | 1.93E-04          | 1.22E-05          | 2.09E-04          | 1.02E-04          |
|         | G13764 | 6.96E-04          | 1.69E-04          | 6.24E-04          | 6.69E-04          | 3.95E-04          | 7.26E-05          | 2.52E-04          | 1.72E-04          | 5.43E-04          | 7.52E-05          | 4.56E-04          | 9.15E-05          | 5.81E-04          | 2.63E-04          |
| Opal-CT |        |                   |                   |                   |                   |                   |                   |                   |                   |                   |                   |                   |                   |                   |                   |
|         | G9942  | 1.80E-03          | 3.52E-04          | 1.21E-03          | 5.16E-04          | 2.59E-04          | 1.01E-04          | 4.97E-04          | 7.87E-05          | 8.80E-04          | 7.96E-05          | 7.23E-04          | 4.10E-05          | 8.21E-04          | 1.64E-04          |
|         | ETH S2 | 7.19E+00          | 5.22E-01          | 1.83E+00          | 5.23E-01          | 2.82E-02          | 2.78E-02          | 5.84E-01          | 1.29E-01          | 9.15E-01          | 1.87E-01          | 5.48E-01          | 7.81E-02          | 5.85E-01          | 8.51E-02          |
|         | GNEW03 | 2.15E-02          | 5.99E-03          | 3.60E-02          | 1.11E-02          | 4.09E-03          | 4.04E-03          | 1.84E-02          | 3.03E-03          | 2.28E-02          | 5.50E-03          | 1.81E-02          | 3.05E-03          | 2.26E-02          | 3.38E-03          |
|         | OOC3   | 3.88E+00          | 4.22E-01          | 1.62E+00          | 2.98E-01          | 8.16E-02          | 8.10E-02          | 2.17E-01          | 2.96E-02          | 1.58E-01          | 2.78E-02          | 7.10E-02          | 9.25E-03          | 5.87E-02          | 7.81E-03          |
|         | T22842 | 1.51E-02          | 1.93E-03          | 9.20E-03          | 2.78E-03          | 5.27E-04          | 5.61E-04          | 3.51E-03          | 4.99E-04          | 3.01E-03          | 7.66E-04          | 2.07E-03          | 4.31E-04          | 4.47E-03          | 8.37E-04          |

|         |        | <sup>206</sup> Pb | <sup>207</sup> Pb | <sup>208</sup> Pb | Σ Pb     | <sup>232</sup> Th | <sup>238</sup> U |
|---------|--------|-------------------|-------------------|-------------------|----------|-------------------|------------------|
| Opal-AG |        |                   |                   |                   |          |                   |                  |
|         | G1401  | 4.20E-03          | 3.46E-03          | 8.54E-03          | 1.62E-02 | 6.66E-02          | 2.65E-02         |
|         | G9811  | 4.70E-03          | 3.81E-03          | 9.75E-03          | 1.83E-02 | 7.81E-02          | 2.65E-02         |
|         | T2233  | 7.19E+00          | 6.00E+00          | 1.50E+01          | 2.82E+01 | 6.93E+00          | 2.36E+00         |
|         | G8608  | 6.99E-03          | 5.63E-03          | 1.43E-02          | 2.69E-02 | 1.47E-01          | 5.72E-02         |
| Opal-AN |        |                   |                   |                   |          |                   |                  |
|         | E1937  | 2.17E-03          | 1.02E-03          | 1.86E-03          | 5.04E-03 | 2.12E-04          | 2.98E-01         |
|         | MS-4   | 4.94E-04          | 2.05E-04          | 3.73E-04          | 1.07E-03 | 9.82E-05          | 1.35E-01         |
|         | G32740 | 6.12E-02          | 5.08E-02          | 1.22E-01          | 2.34E-01 | 4.70E-03          | 3.40E-02         |
|         | M8736  | 4.43E-04          | 5.99E-05          | 7.75E-04          | 1.28E-03 | 9.55E-05          | 1.16E-01         |
|         | OOC10  | 3.29E-02          | 1.83E-03          | 9.99E-04          | 3.57E-02 | 5.33E-05          | 1.52E+01         |
|         | T18511 | 4.42E-02          | 2.49E-03          | 2.85E-04          | 4.69E-02 | 1.70E-04          | 2.49E+01         |
|         | T18117 | 1.00E+00          | 7.71E-01          | 1.87E+00          | 3.65E+00 | 4.26E-03          | 5.48E+01         |
|         | G7107  | 1.94E-03          | 1.88E-03          | 4.21E-03          | 8.03E-03 | 1.35E-03          | 5.29E-02         |
|         | G8877  | 1.95E-03          | 3.03E-04          | 7.86E-04          | 3.04E-03 | 2.37E-04          | 3.81E-01         |
|         | G13764 | 1.40E-03          | 4.20E-04          | 7.19E-04          | 2.54E-03 | 1.48E-04          | 2.95E-01         |
| Opal-CT |        |                   |                   |                   |          |                   |                  |
|         | G9942  | 9.39E-04          | 7.89E-04          | 1.58E-03          | 3.31E-03 | 3.99E-03          | 8.74E-02         |
|         | NMNHE  | 5.40E-01          | 4.58E-01          | 1.16E+00          | 2.16E+00 | 1.21E+00          | 7.81E-01         |
|         | TH S2  |                   |                   |                   |          |                   |                  |
|         | GNEW03 | 3.13E-02          | 2.78E-02          | 6.68E-02          | 1.26E-01 | 1.77E-02          | 2.12E-01         |
|         | OOC3   | 1.19E-01          | 9.83E-02          | 2.44E-01          | 4.62E-01 | 2.99E-01          | 3.46E-01         |
|         | T22842 | 8.82E-02          | 7.86E-02          | 1.84E-01          | 3.51E-01 | 2.55E-03          | 2.17E+01         |

## S2: Additional Spectra and Delay Time Relaxation Plots

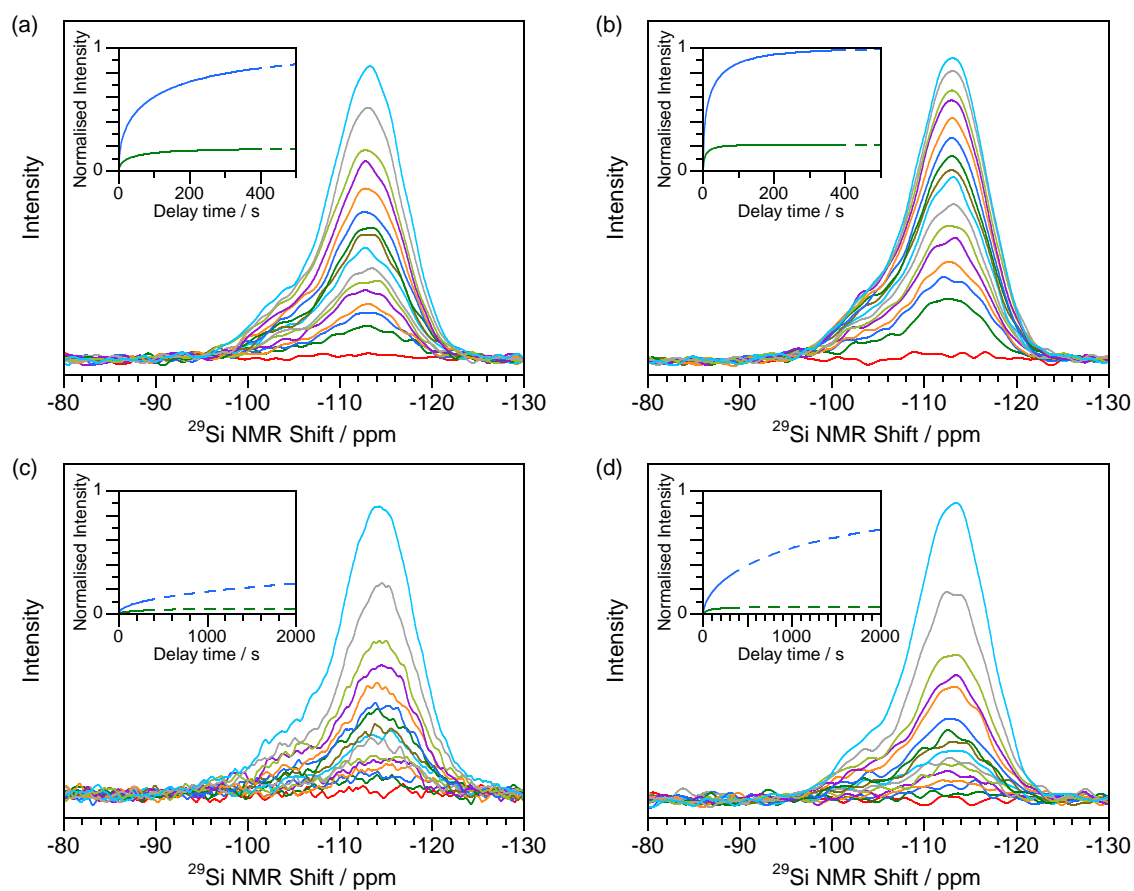

**Figure S1.** Evolution of the spectrum with delay time for (a) a translucent zone in G34475 (hydrophane opal (opal-A) from Dubník, Slovakia), (b) an opaque zone in G34475, (c) “Spanish menilite” (GNEW23 from Caldes de Malvella, Spain), and (d) Gilson synthetic opal. Delay times are 1, 2, 3, 5, 7, 10, 15, 20, 25, 35, 50, 75, 100, 200 and 400s (with the zero-time measurement shown in red). Insets are calculated fitting of Q<sub>3</sub> (green) and Q<sub>4</sub> (blue) components using data in Table 1 and scaled to Q<sub>4</sub> maximum.
